# Supplementary material for: Mast Cell Interaction with Foxp3+ Regulatory T Cells Occur in the Dermis after Initiation of IgE-Mediated Cutaneous Anaphylaxis
Source: Cells. 2022 Sep 29;11(19):3055. doi: 10.3390/cells11193055 (PMC9564058; doi:10.3390/cells11193055)
Supplement: Supplementary file 1 [file cells-11-03055-s001.zip]

Archive with 6 entries (6 files):
- cells-1873037-supplementary.pdf
- cells-1873037-Video S1.mov
- cells-1873037-Video S2.mov
- cells-1873037-Video S3.mov
- cells-1873037-Video S4.mov
- cells-1873037-Video S5.mov
